# Supplementary material for: High temperature behaviour of Ag-exchanged Y zeolites used for PFAS sequestration from water
Source: Royal Society of Chemistry journal article supplement (doi:10.1039/d3cp01584j), 2023-01-01
Supplement: d3cp01584j2.pdf [file d3cp01584j2.pdf]

## Supplementary Information

### High temperature behaviour of Ag-exchanged Y zeolites used for PFAS sequestration from water.

Maura Mancinelli<sup>a</sup>, Annalisa Martucci<sup>a\*</sup>, Gianmarco Salani<sup>a</sup>, Gianluca Bianchini<sup>a\*</sup>, Lara Gigli<sup>b</sup>, Jasper Rikkert Plaisier<sup>b</sup>, Francesco Colombo<sup>a</sup>

---

<sup>a</sup> Department of Physics and Earth Sciences, University of Ferrara Via Saragat 1, I-44121, Ferrara, Italy. E-mail: \*mrs@unife.it; \*gianluca.bianchini@unife.it

<sup>b</sup> Elettra-Sincrotrone Trieste S.C.p.A., Beamline, Strada Statale 14 - km 163,5 in AREA Science Park, Basovizza, Trieste, Italy.

**Tables SII.** Atomic bond distances for PFOA and PFOS molecules.

| PFOS     |            | PFOA       |            |
|----------|------------|------------|------------|
| Distance | Value(Å)   | Distance   | Value(Å)   |
| C1-C1    | 2.35141(3) | C1-C1 [x2] | 1.35731(2) |
| C1-C1    | 1.35759(1) | C2-C3      | 1.35728(2) |
| C1-C2    | 1.35759(2) | C2-C4      | 1.33862(2) |
| C1-C2    | 2.37314(3) | C2-C4      | 2.08664(3) |
| C1-C2    | 2.32818(3) | C3-C3      | 1.35697(2) |
| C1-C3    | 2.29788(3) | C3-C3      | 2.00820(3) |
| C1-C4    | 2.37624(3) | C3-O1n     | 2.26448(3) |
| C2-C3    | 1.35756(1) | C3-O1n     | 1.17228(2) |
| C2-C3    | 2.37292(3) | C3-O1n     | 2.08067(3) |
| C2-C5    | 2.27746(3) | C4-C5      | 1.31726(2) |
| C2-C4    | 1.33889(1) | C4-C4      | 1.37449(2) |
| C2-C4    | 2.32708(3) | C4-C4      | 1.71812(3) |
| C2-C4    | 2.08706(2) | C5-C4      | 1.31618(2) |
| C3-C3    | 1.35725(1) | C5-F1      | 1.25888(2) |
| C3-C3    | 2.00861(3) | C5-F1      | 1.26097(2) |
| C3-C3    | 2.33024(2) | C5-F2      | 1.15101(1) |
| C3-C4    | 2.33157(3) | F1-F2      | 2.07860(3) |
| C3-S     | 1.71387(2) | F1-F1      | 1.57379(2) |
| C3-S     | 1.38361(1) | F1-F1      | 2.48059(4) |
| C3-S     | 2.17486(2) | F1-F1      | 1.91742(2) |
| C3-S     | 1.67828(2) | O1n-H1     | 1.92601(3) |
| C4-C4    | 1.37477(1) | O1n-H1     | 1.92760(3) |
| C4-C4    | 1.71847(3) | O1n-H1     | 0.85697(1) |
| C4-C5    | 1.31753(1) | O1n-H1     | 0.85839(1) |
| C4-C5    | 2.36783(3) |            |            |
| C5-C2    | 2.27596(3) |            |            |
| C5-F1    | 2.45411(3) |            |            |
| C5-F1    | 1.26123(2) |            |            |
| F1-F1    | 1.57412(2) |            |            |
| F1-F1    | 2.48109(4) |            |            |
| F1-F1    | 1.91781(2) |            |            |
| F1-F2    | 2.07902(3) |            |            |
| F2-F1    | 2.07743(3) |            |            |
| S-O1n    | 2.10599(2) |            |            |
| S-O1n    | 1.35819(1) |            |            |
| S-O1n    | 2.19509(3) |            |            |
| S-O1n    | 1.40587(2) |            |            |
| S-O2n    | 2.19071(3) |            |            |
| S-O2n    | 1.57724(2) |            |            |
| O1n-H1   | 2.02283(3) |            |            |
| O1n-H1   | 1.56144(2) |            |            |

**Tables SI2.** Framework atomic coordinates, site occupancy, and atomic displacement parameters, ADPs ( $U_{\text{iso}}^* = U_i/U_e * 100 [\text{\AA}^{-2}]$ ) for the investigated AgY760 bare zeolite heated at 25, 200, 250, 550 and 900°C.

| <b>AgY760-25</b> |            |            |            |                 |                  |
|------------------|------------|------------|------------|-----------------|------------------|
| <b>Site</b>      | <b>x/a</b> | <b>y/b</b> | <b>z/c</b> | <b>Fraction</b> | <b>Ui/Ue*100</b> |
| <i>T</i>         | 0.0362(1)  | 0.3040(1)  | 0.1240(1)  | 0.9000          | 1.51             |
| O1               | 0.0000     | 0.3555(1)  | 0.1444(1)  | 1.0000          | 1.61             |
| O2               | 0.0033(1)  | 0.2533(1)  | 0.1088(1)  | 1.0000          | 1.61             |
| O3               | 0.0779(1)  | 0.2860(1)  | 0.1720(1)  | 1.0000          | 1.61             |
| O4               | 0.0702(1)  | 0.3221(1)  | 0.0702(1)  | 1.0000          | 1.61             |
| Ag(I)            | 0.0000     | 0.0000     | 0.0000     | 0.0329          | 10.87            |
| Ag(I')           | 0.0740     | 0.0740     | 0.0740     | 0.0715          | 10.87            |
| Ag(IIb)          | 0.1889     | 0.1889     | 0.1889     | 0.0393          | 10.87            |
| w1               | 0.4632     | 0.0886     | 0.0886     | 0.0830          | 2.58             |
| w2               | 0.625      | 0.1249     | 0.3036     | 0.0832          | 1.47             |
| w3               | 0.39800    | 0.24670    | 0.24670    | 0.0569          | 4.04             |
| w4               | 0.2962     | -0.0460    | -0.0460    | 0.0639          | 5.32             |

| <b>AgY760-200</b> |            |            |            |                 |                  |
|-------------------|------------|------------|------------|-----------------|------------------|
| <b>Site</b>       | <b>x/a</b> | <b>y/b</b> | <b>z/c</b> | <b>Fraction</b> | <b>Ui/Ue*100</b> |
| <i>T</i>          | 0.0361(1)  | 0.3042(1)  | 0.1240(1)  | 0.9000          | 1.30             |
| O1                | 0.0000     | 0.3555(1)  | 0.1444(1)  | 1.0000          | 1.85             |
| O2                | -0.0034(1) | 0.2534(1)  | 0.1091(2)  | 1.0000          | 1.85             |
| O3                | 0.0782(1)  | 0.2862(2)  | 0.1717(1)  | 1.0000          | 1.85             |
| O4                | 0.0700(1)  | 0.3221(1)  | 0.0700(1)  | 1.0000          | 1.85             |
| Ag(I)             | 0.0000     | 0.0000     | 0.0000     | 0.0420          | 12.15            |
| Ag(I')            | 0.0675(13) | 0.0675(1)  | 0.0675(3)  | 0.0720          | 12.15            |
| Ag(IIb)           | 0.1719(42) | 0.1719(2)  | 0.1719(2)  | 0.0340          | 12.15            |
| w1                | 0.4480(6)  | 0.0755(3)  | 0.0755(8)  | 0.0830          | 9.50             |
| w2                | 0.6250     | 0.1250     | 0.3088(4)  | 0.0830          | 7.34             |
| w3                | 0.4066(1)  | 0.2647(4)  | 0.2647(2)  | 0.0570          | 7.34             |
| w4                | 0.3089(1)  | -0.0588(1) | -0.0588(1) | 0.0600          | 4.82             |

---

**AgY760-250**

| Site     | <i>x/a</i> | <i>y/b</i> | <i>z/c</i> | Fraction | Ui/Ue*100 |
|----------|------------|------------|------------|----------|-----------|
| <i>T</i> | 0.0360(1)  | 0.3044(1)  | 0.1239(1)  | 0.9000   | 2.03      |
| O1       | 0.0000     | 0.3557(1)  | 0.1442(1)  | 1.0000   | 2.78      |
| O2       | -0.0034(1) | 0.2533(1)  | 0.1095(1)  | 1.0000   | 2.78      |
| O3       | 0.0785(1)  | 0.2867(1)  | 0.1715(1)  | 1.0000   | 2.78      |
| O4       | 0.0695(1)  | 0.3220(1)  | 0.0695(1)  | 1.0000   | 2.78      |
| Ag(I)    | 0.0000     | 0.0000     | 0.0000     | 0.0500   | 12.15     |
| Ag(I')   | 0.0657     | 0.0657     | 0.0657     | 0.0720   | 12.15     |
| Ag(IIb)  | 0.1651     | 0.1651     | 0.1651     | 0.0300   | 12.15     |
| w1       | 0.4575     | 0.0690     | 0.0690     | 0.0830   | 4.80      |
| w2       | 0.6250     | 0.1250     | 0.3161     | 0.0832   | 4.80      |
| w3       | 0.3913     | 0.2539     | 0.2539     | 0.0569   | 4.80      |
| w4       | 0.2410     | 0.0091     | 0.0091     | 0.0433   | 4.80      |

---

**AgY760-550**

| Site     | <i>x/a</i> | <i>y/b</i> | <i>z/c</i> | Fraction | Ui/Ue*100 |
|----------|------------|------------|------------|----------|-----------|
| <i>T</i> | 0.0366(1)  | 0.3044(1)  | 0.1234(1)  | 0.9000   | 2.14      |
| O1       | 0.0000     | 0.3550(1)  | 0.1450(1)  | 1.0000   | 3.12      |
| O2       | -0.0027(1) | 0.2527(1)  | 0.1099(1)  | 1.0000   | 3.12      |
| O3       | 0.0805(1)  | 0.2872(1)  | 0.1695(1)  | 1.0000   | 3.12      |
| O4       | 0.0680(1)  | 0.3228(1)  | 0.0681(1)  | 1.0000   | 3.12      |
| Ag(I)    | 0.0000     | 0.0000     | 0.0000     | 0.0935   | 15.14     |
| Ag(I')   | 0.0568     | 0.0568     | 0.0568     | 0.0670   | 15.14     |
| Ag(IIb)  | 0.2188     | 0.2188     | 0.2188     | 0.0133   | 15.14     |
| w1       | 0.4443     | 0.0900     | 0.0900     | 0.0509   | 11.87     |

---

**AgY760-900**

| Site     | <i>x/a</i> | <i>y/b</i> | <i>z/c</i> | Fraction | Ui/Ue*100 |
|----------|------------|------------|------------|----------|-----------|
| <i>T</i> | 0.0364(1)  | 0.3045(1)  | 0.1233(1)  | 0.9000   | 3.86      |
| O1       | 0.0000     | 0.3554(1)  | 0.1446(1)  | 1.0000   | 5.43      |
| O2       | -0.0027(1) | 0.2527(1)  | 0.1101(2)  | 1.0000   | 5.43      |
| O3       | 0.0807(1)  | 0.2878(2)  | 0.1692(1)  | 1.0000   | 5.43      |
| O4       | 0.0675(1)  | 0.3229(1)  | 0.0675(1)  | 1.0000   | 5.43      |
| Ag(I)    | 0.0000     | 0.0000     | 0.0000     | 0.0920   | 12.5      |
| Ag(I')   | 0.0588(1)  | 0.0588(1)  | 0.0588(1)  | 0.0710   | 12.5      |
| Ag(IIb)  | 0.2308(8)  | 0.2308(8)  | 0.2308(6)  | 0.0100   | 12.5      |

**Tables SI3.** Framework atomic coordinates, site occupancy, and atomic displacement parameters, ADPs ( $U_{\text{iso}}^* = U_i/U_e^*100 [\text{\AA}^{-2}]$ ) for the investigated AgY760 PFOA loaded zeolite at 25, 200, 250, 550, 700°C *in situ* heating.

| <b>AgY760-PFOA-25</b> |            |            |            |                 |                  |
|-----------------------|------------|------------|------------|-----------------|------------------|
| <b>Site</b>           | <b>x/a</b> | <b>y/b</b> | <b>z/c</b> | <b>Fraction</b> | <b>Ui/Ue*100</b> |
| <i>T</i>              | 0.0359(1)  | 0.30374(9) | 0.1247(1)  | 0.9000          | 0.66             |
| O1                    | 0.0000     | 0.3559(1)  | 0.1440(1)  | 1.0000          | 1.65             |
| O2                    | -0.0036(1) | 0.2535(1)  | 0.1089(2)  | 1.0000          | 1.65             |
| O3                    | 0.0763(1)  | 0.2853(1)  | 0.1736(1)  | 1.0000          | 1.65             |
| O4                    | 0.0715(1)  | 0.3205(1)  | 0.0715(1)  | 1.0000          | 1.65             |
| C1                    | 0.2610     | 0.3400     | 0.3005     | 0.0751          | 14.52            |
| C2                    | 0.2193     | 0.3772     | 0.3005     | 0.0751          | 14.52            |
| C3                    | 0.2240     | 0.4187     | 0.2635     | 0.0751          | 14.52            |
| C5                    | 0.1409     | 0.4160     | 0.3341     | 0.1502          | 14.52            |
| C4                    | 0.3400     | 0.1810     | 0.3800     | 0.0751          | 14.52            |
| F1                    | 0.4258     | 0.1190     | 0.3800     | 0.2816          | 14.52            |
| F2                    | 0.1400     | 0.4494     | 0.3005     | 0.5632          | 14.52            |
| H1                    | 0.2800     | 0.4494     | 0.2487     | 0.0563          | 14.52            |
| O1n                   | 0.3005     | 0.4494     | 0.2200     | 0.0931          | 14.52            |
| Ag(I)                 | 0.0000     | 0.0000     | 0.0000     | 0.0215          | 10.25            |
| Ag(I')                | 0.1852     | 0.1852     | 0.1852     | 0.0638          | 10.25            |
| Ag(IIb)               | 0.2368     | 0.2368     | 0.2368     | 0.0330          | 10.25            |
| w1                    | 0.6267     | 0.0524     | 0.0524     | 0.2049          | 5.04             |
| w2                    | 0.6250     | 0.1250     | 0.2688     | 0.1531          | 5.04             |
| w3                    | 0.4753     | 0.1854     | 0.1854     | 0.1658          | 5.04             |
| w4                    | 0.2970     | -0.0469    | -0.0469    | 0.2051          | 5.04             |

**AgY760-PFOA-200**

| <b>Site</b> | <b>x/a</b> | <b>y/b</b> | <b>z/c</b> | <b>Fraction</b> | <b>Ui/Ue*100</b> |
|-------------|------------|------------|------------|-----------------|------------------|
| <i>T</i>    | 0.0361(1)  | 0.3036(1)  | 0.1250(1)  | 0.9000          | 0.66             |
| O1          | 0.0000     | 0.3557(1)  | 0.1442(1)  | 1.0000          | 1.65             |
| O2          | -0.0035(1) | 0.2535(1)  | 0.1095(2)  | 1.0000          | 1.65             |
| O3          | 0.0766(1)  | 0.2855(2)  | 0.1733(1)  | 1.0000          | 1.65             |
| O4          | 0.0713(1)  | 0.3203(2)  | 0.0713(1)  | 1.0000          | 1.65             |
| C1          | 0.2610     | 0.3400     | 0.3005     | 0.0681          | 14.68            |
| C2          | 0.2193     | 0.3772     | 0.3005     | 0.0681          | 14.68            |
| C3          | 0.2240     | 0.4187     | 0.2635     | 0.0681          | 14.68            |
| C5          | 0.1409     | 0.4160     | 0.3341     | 0.1362          | 14.68            |
| C4          | 0.3400     | 0.1810     | 0.3800     | 0.0681          | 14.68            |
| F1          | 0.4258     | 0.1190     | 0.3800     | 0.2554          | 14.68            |
| F2          | 0.1400     | 0.4494     | 0.3005     | 0.5107          | 14.68            |
| H1          | 0.2800     | 0.4494     | 0.2487     | 0.0511          | 14.68            |
| O1n         | 0.3005     | 0.4494     | 0.2200     | 0.1013          | 14.68            |
| Ag(I)       | 0.0000     | 0.0000     | 0.0000     | 0.0266          | 11.90            |
| Ag(I')      | 0.0577     | 0.0577     | 0.0577     | 0.0610          | 11.90            |
| Ag(IIb)     | 0.1904     | 0.1904     | 0.1904     | 0.0350          | 11.90            |
| w1          | 0.6336     | 0.0853     | 0.0853     | 0.0249          | 8.40             |

**AgY760-PFOA-250**

| <b>Site</b> | <b>x/a</b> | <b>y/b</b> | <b>z/c</b> | <b>Fraction</b> | <b>Ui/Ue*100</b> |
|-------------|------------|------------|------------|-----------------|------------------|
| <i>T</i>    | 0.0361(1)  | 0.3039(1)  | 0.1244(1)  | 0.9000          | 0.87             |
| O1          | 0.0000     | 0.3556(1)  | 0.1443(1)  | 1.0000          | 1.96             |
| O2          | -0.0033(1) | 0.2532(1)  | 0.1097(2)  | 1.0000          | 1.96             |
| O3          | 0.0779(1)  | 0.2863(1)  | 0.1720(1)  | 1.0000          | 1.96             |
| O4          | 0.0700(1)  | 0.3210(1)  | 0.0700(1)  | 1.0000          | 1.96             |
| C1          | 0.2610     | 0.3400     | 0.3005     | 0.0559          | 15.00            |
| C2          | 0.2193     | 0.3772     | 0.3005     | 0.0559          | 15.00            |
| C3          | 0.2240     | 0.4187     | 0.2635     | 0.0559          | 15.00            |
| C5          | 0.1409     | 0.4160     | 0.3341     | 0.1118          | 15.00            |
| C4          | 0.3400     | 0.1810     | 0.3800     | 0.0559          | 15.00            |
| F1          | 0.4258     | 0.1190     | 0.3800     | 0.2096          | 15.00            |
| F2          | 0.1400     | 0.4494     | 0.3005     | 0.4193          | 15.00            |
| H1          | 0.2800     | 0.4494     | 0.2487     | 0.0419          | 15.00            |
| O1n         | 0.3005     | 0.4494     | 0.2200     | 0.0838          | 15.00            |
| Ag(I)       | 0.0000     | 0.0000     | 0.0000     | 0.0340          | 12.05            |
| Ag(I')      | 0.0583     | 0.0583     | 0.5830     | 0.0590          | 12.05            |
| Ag(IIb)     | 0.1887     | 0.1887     | 0.1887     | 0.0330          | 12.05            |
| w1          | 0.6014     | 0.0747     | 0.0747     | 0.0205          | 8.82             |

---

**AgY760-PFOA-550**

| <b>Site</b> | <b>x/a</b> | <b>y/b</b> | <b>z/c</b> | <b>Fraction</b> | <b>Ui/Ue*100</b> |
|-------------|------------|------------|------------|-----------------|------------------|
| <i>T</i>    | 0.0363(1)  | 0.3045(1)  | 0.1235(1)  | 0.9000          | 0.95             |
| O1          | 0.0000     | 0.3557(1)  | 0.1442(1)  | 1.0000          | 2.32             |
| O2          | -0.0029(1) | 0.2529(1)  | 0.1099(1)  | 1.0000          | 2.32             |
| O3          | 0.0796(1)  | 0.2875(1)  | 0.1703(1)  | 1.0000          | 2.32             |
| O4          | 0.0684(1)  | 0.3227(1)  | 0.0684(1)  | 1.0000          | 2.32             |
| Ag(I)       | 0.0000     | 0.0000     | 0.0000     | 0.0860          | 19.81            |
| Ag(I')      | 0.0541(2)  | 0.0541(2)  | 0.0541(2)  | 0.1010          | 19.81            |

---

**AgY760-PFOA-700**

| <b>Site</b> | <b>x/a</b> | <b>y/b</b> | <b>z/c</b> | <b>Fraction</b> | <b>Ui/Ue*100</b> |
|-------------|------------|------------|------------|-----------------|------------------|
| <i>T</i>    | 0.0364(1)  | 0.3045(1)  | 0.1232(4)  | 0.9000          | 1.07             |
| O1          | 0.0000     | 0.3554(1)  | 0.1445(1)  | 1.0000          | 2.62             |
| O2          | -0.0027(1) | 0.2526(1)  | 0.1102(1)  | 1.0000          | 2.62             |
| O3          | 0.0807(1)  | 0.2878(1)  | 0.1692(1)  | 1.0000          | 2.62             |
| O4          | 0.0675(1)  | 0.3230(1)  | 0.0675(1)  | 1.0000          | 2.62             |
| Ag(I)       | 0.0000     | 0.0000     | 0.0000     | 0.0860          | 20.10            |
| Ag(I')      | 0.0509     | 0.0509     | 0.0509     | 0.1087          | 20.10            |

**Tables SI4.** Framework atomic coordinates, site occupancy, and atomic displacement parameters, ADPs ( $U_{\text{iso}}^* = U_i/U_e * 100 [\text{\AA}^{-2}]$ ) for the investigated AgY760 PFOS loaded zeolite heated at 25, 200, 250, 550, 800°C.

| <b>AgY760-PFOS-25</b> |            |            |            |                 |                  |
|-----------------------|------------|------------|------------|-----------------|------------------|
| <b>Site</b>           | <b>x/a</b> | <b>y/b</b> | <b>z/c</b> | <b>Fraction</b> | <b>Ui/Ue*100</b> |
| <i>T</i>              | 0.0359(1)  | 0.3037(1)  | 0.1245(1)  | 0.9000          | 0.84             |
| O1                    | 0.0000     | 0.3558(1)  | 0.1441(1)  | 1.0000          | 1.60             |
| O2                    | -0.0035(1) | 0.2534(1)  | 0.1088(2)  | 1.0000          | 1.60             |
| O3                    | 0.0765(7)  | 0.2853(2)  | 0.1734(1)  | 1.0000          | 1.60             |
| O4                    | 0.0714(1)  | 0.3207(2)  | 0.0714(1)  | 1.0000          | 1.60             |
| S                     | 0.2219     | 0.4494     | 0.2000     | 0.0457          | 17.83            |
| C1                    | 0.2610     | 0.3400     | 0.3005     | 0.0610          | 17.83            |
| C2                    | 0.2193     | 0.3772     | 0.3005     | 0.0610          | 17.83            |
| C3                    | 0.2240     | 0.4187     | 0.2635     | 0.0610          | 17.83            |
| C5                    | 0.1409     | 0.4160     | 0.3341     | 0.1220          | 17.83            |
| C4                    | 0.3400     | 0.1810     | 0.3800     | 0.0610          | 17.83            |
| F2                    | 0.1400     | 0.4494     | 0.3005     | 0.4575          | 17.83            |
| F1                    | 0.4258     | 0.1190     | 0.3800     | 0.2288          | 17.83            |
| H1                    | 0.1400     | 0.4580     | 0.2400     | 0.0457          | 17.83            |
| O1n                   | 0.1600     | 0.4580     | 0.2600     | 0.0457          | 17.83            |
| O2n                   | 0.1800     | 0.4100     | 0.3005     | 0.0457          | 17.83            |
| w1                    | 0.5576     | 0.1071     | 0.1071     | 0.1458          | 8.12             |
| w3                    | 0.3688     | 0.2765     | 0.2765     | 0.2180          | 8.12             |
| w4                    | 0.3006     | -0.0505    | -0.0505    | 0.4766          | 8.12             |
| Ag(I)                 | 0.0000     | 0.0000     | 0.0000     | 0.0634          | 11.24            |
| Ag(I')                | 0.0938     | 0.0938     | 0.0938     | 0.0507          | 11.24            |
| Ag(IIb)               | 0.1907     | 0.1907     | 0.1907     | 0.0642          | 11.24            |



**AgY760-PFOS-200**

| Site     | x/a        | y/b       | z/c       | Fraction | Ui/Ue*100 |
|----------|------------|-----------|-----------|----------|-----------|
| <i>T</i> | 0.0360(1)  | 0.3037(1) | 0.1255(1) | 0.9000   | 0.95      |
| O1       | 0.0000     | 0.3562(1) | 0.1437(1) | 1.0000   | 1.74      |
| O2       | -0.0040(1) | 0.2540(1) | 0.1092(2) | 1.0000   | 1.74      |
| O3       | 0.0749(1)  | 0.2851(2) | 0.1751(1) | 1.0000   | 1.74      |
| O4       | 0.0728(1)  | 0.3195(2) | 0.0728(1) | 1.0000   | 1.74      |
| S        | 0.2219     | 0.4494    | 0.2000    | 0.0413   | 18.21     |
| C1       | 0.2610     | 0.3400    | 0.3005    | 0.0550   | 18.21     |
| C2       | 0.2193     | 0.3772    | 0.3005    | 0.0550   | 18.21     |
| C3       | 0.2240     | 0.4187    | 0.2635    | 0.0550   | 18.21     |
| C5       | 0.1409     | 0.4160    | 0.3341    | 0.1100   | 18.21     |
| C4       | 0.3400     | 0.1810    | 0.3800    | 0.0550   | 18.21     |
| F2       | 0.1400     | 0.4494    | 0.3005    | 0.4125   | 18.21     |
| F1       | 0.4258     | 0.1190    | 0.3800    | 0.2063   | 18.21     |
| H1       | 0.1400     | 0.4580    | 0.2400    | 0.0413   | 18.21     |
| O1n      | 0.1600     | 0.4580    | 0.2600    | 0.0413   | 18.21     |
| O2n      | 0.1800     | 0.4100    | 0.3005    | 0.0413   | 18.21     |
| w1       | 0.5716     | 0.1440    | 0.1440    | 0.0674   | 9.57      |
| w3       | 0.3186     | 0.2931    | 0.2931    | 0.1004   | 1.10      |
| Ag(I)    | 0.0000     | 0.0000    | 0.0000    | 0.0690   | 13.44     |
| Ag(I')   | 0.0710     | 0.0710    | 0.0710    | 0.0680   | 13.44     |
| Ag(IIb)  | 0.1854     | 0.1854    | 0.1854    | 0.0400   | 13.44     |

**AgY760-PFOS-250**

| Site     | x/a        | y/b       | z/c       | Fraction | Ui/Ue*100 |
|----------|------------|-----------|-----------|----------|-----------|
| <i>T</i> | 0.0360(1)  | 0.3038(1) | 0.1253(1) | 0.9000   | 0.99      |
| O1       | 0.0000     | 0.3561(1) | 0.1438(1) | 1.0000   | 1.78      |
| O2       | -0.0038(1) | 0.2538(1) | 0.1094(2) | 1.0000   | 1.78      |
| O3       | 0.0756(1)  | 0.2854(2) | 0.1743(1) | 1.0000   | 1.78      |
| O4       | 0.0721(1)  | 0.3200(2) | 0.0721(1) | 1.0000   | 1.78      |
| S        | 0.2219     | 0.4494    | 0.2000    | 0.0376   | 18.24     |
| C1       | 0.2610     | 0.3400    | 0.3005    | 0.0501   | 18.24     |
| C2       | 0.2193     | 0.3772    | 0.3005    | 0.0501   | 18.24     |
| C3       | 0.2240     | 0.4187    | 0.2635    | 0.0501   | 18.24     |
| C5       | 0.1409     | 0.4160    | 0.3341    | 0.1002   | 18.24     |
| C4       | 0.3400     | 0.1810    | 0.3800    | 0.0501   | 18.24     |
| F2       | 0.1400     | 0.4494    | 0.3005    | 0.3758   | 18.24     |
| F1       | 0.4258     | 0.1190    | 0.3800    | 0.1879   | 18.24     |
| H1       | 0.1400     | 0.4580    | 0.2400    | 0.0376   | 18.24     |
| O1n      | 0.1600     | 0.4580    | 0.2600    | 0.0376   | 18.24     |
| O2n      | 0.1800     | 0.4100    | 0.3005    | 0.0376   | 18.24     |
| w1       | 0.5729     | 0.1475    | 0.1475    | 0.0639   | 9.80      |
| w3       | 0.3178     | 0.2908    | 0.2908    | 0.0815   | 7.97      |
| Ag(I)    | 0.0000     | 0.0000    | 0.0000    | 0.0735   | 14.21     |
| Ag(I')   | 0.0684     | 0.0684    | 0.0684    | 0.0831   | 14.21     |
| Ag(IIb)  | 0.1862     | 0.1862    | 0.1862    | 0.0273   | 14.21     |

**AgY760-PFOS-550**

| <b>Site</b> | <b>x/a</b> | <b>y/b</b> | <b>z/c</b> | <b>Fraction</b> | <b>Ui/Ue*100</b> |
|-------------|------------|------------|------------|-----------------|------------------|
| <i>T</i>    | 0.0361(1)  | 0.3044(1)  | 0.1239(1)  | 0.9000          | 1.51             |
| O1          | 0.0000     | 0.3561(1)  | 0.1438(1)  | 1.0000          | 2.46             |
| O2          | -0.0034(1) | 0.2533(1)  | 0.1098(2)  | 1.0000          | 2.46             |
| O3          | 0.0784(1)  | 0.2872(2)  | 0.1715(1)  | 1.0000          | 2.46             |
| O4          | 0.0694(1)  | 0.3219(2)  | 0.0694(1)  | 1.0000          | 2.46             |
| S           | 0.2219     | 0.4494     | 0.2000     | 0.0080          | 22.01            |
| C1          | 0.2610     | 0.3400     | 0.3005     | 0.0107          | 22.01            |
| C2          | 0.2193     | 0.3772     | 0.3005     | 0.0107          | 22.01            |
| C3          | 0.2240     | 0.4187     | 0.2635     | 0.0107          | 22.01            |
| C5          | 0.1409     | 0.4160     | 0.3341     | 0.0214          | 22.01            |
| C4          | 0.3400     | 0.1810     | 0.3800     | 0.0107          | 22.01            |
| F2          | 0.1400     | 0.4494     | 0.3005     | 0.0803          | 22.01            |
| F1          | 0.4258     | 0.1190     | 0.3800     | 0.0401          | 22.01            |
| H1          | 0.1400     | 0.4580     | 0.2400     | 0.0080          | 22.01            |
| O1n         | 0.1600     | 0.4580     | 0.2600     | 0.0080          | 22.01            |
| O2n         | 0.1800     | 0.4100     | 0.3005     | 0.0080          | 22.01            |
| Ag(I)       | 0.0000     | 0.0000     | 0.0000     | 0.0863          | 18.00            |
| Ag(I')      | 0.0616     | 0.0616     | 0.0616     | 0.0777          | 18.00            |
| Ag(IIb)     | 0.1843     | 0.1843     | 0.1843     | 0.0183          | 18.00            |

**AgY760-PFOS-800**

| <b>Site</b> | <b>x/a</b> | <b>y/b</b> | <b>z/c</b> | <b>Fraction</b> | <b>Ui/Ue*100</b> |
|-------------|------------|------------|------------|-----------------|------------------|
| <i>T</i>    | 0.0363(2)  | 0.3045(2)  | 0.1234(1)  | 0.9000          | 1.16             |
| O1          | 0.0000     | 0.3557(1)  | 0.1442(1)  | 1.0000          | 2.08             |
| O2          | -0.0028(5) | 0.2528(1)  | 0.1101(1)  | 1.0000          | 2.08             |
| O3          | 0.0800(1)  | 0.2878(1)  | 0.1700(1)  | 1.0000          | 2.08             |
| O4          | 0.0680(1)  | 0.3226(1)  | 0.0680(1)  | 1.0000          | 2.08             |
| Ag(I)       | 0.0000     | 0.0000     | 0.0000     | 0.0991          | 20.96            |
| Ag(I')      | 0.0595     | 0.0595     | 0.0595     | 0.0785          | 20.96            |
| Ag(IIb)     | 0.2380     | 0.2380     | 0.2380     | 0.0137          | 20.96            |

**Table SI5.** Framework atomic bond distances and angles for AgY760 at 25, 200, 250, 550, and 900 °C.

|                        | <b>AgY760-25</b> | <b>AgY760-200</b> | <b>AgY760-250</b> | <b>AgY760-550</b> | <b>AgY760-900</b> |
|------------------------|------------------|-------------------|-------------------|-------------------|-------------------|
| Bond(Å)                | Value (Å)        |                   |                   |                   |                   |
| <i>T</i> -O1           | 1.605(2)         | 1.601(2)          | 1.600(2)          | 1.601(2)          | 1.599(2)          |
| <i>T</i> -O2           | 1.602(2)         | 1.604(2)          | 1.603(2)          | 1.608(2)          | 1.604(2)          |
| <i>T</i> -O3           | 1.603(2)         | 1.606(2)          | 1.605(2)          | 1.600(2)          | 1.599(2)          |
| <i>T</i> -O4           | 1.605(2)         | 1.607(2)          | 1.608(2)          | 1.607(2)          | 1.610(2)          |
| MeanValue              | 1.604            | 1.605             | 1.604             | 1.604             | 1.603             |
| Angle(°)               | Value (°)        |                   |                   |                   |                   |
| O1- <i>T</i> -O2       | 109.8(2)         | 109.9(2)          | 110.0(2)          | 109.6(2)          | 109.9(2)          |
| O1- <i>T</i> -O3       | 109.5(2)         | 109.6(2)          | 109.6(2)          | 109.8(2)          | 109.9(2)          |
| O1- <i>T</i> -O4       | 108.6(2)         | 108.8(2)          | 108.7(2)          | 108.9(2)          | 108.4(2)          |
| O2- <i>T</i> -O3       | 109.6(2)         | 109.4(2)          | 109.4(2)          | 109.5(2)          | 109.6(2)          |
| O2- <i>T</i> -O4       | 109.3(2)         | 109.2(2)          | 109.2(2)          | 109.1(2)          | 108.9(2)          |
| O3- <i>T</i> -O4       | 109.9(2)         | 109.6(2)          | 109.6(2)          | 109.8(2)          | 109.8(2)          |
| MeanValue              | 109.5            | 109.4             | 109.4             | 109.5             | 109.4             |
| <i>T</i> -O1- <i>T</i> | 141.2(4)         | 141.4(4)          | 141.1(4)          | 143.9(4)          | 143.1(4)          |
| <i>T</i> -O2- <i>T</i> | 150.0(3)         | 150.4(4)          | 150.9(3)          | 151.9(4)          | 152.1(4)          |
| <i>T</i> -O3- <i>T</i> | 147.4(3)         | 147.6(3)          | 148.4(3)          | 149.6(4)          | 150.5(4)          |
| <i>T</i> -O4- <i>T</i> | 139.5(2)         | 139.6(2)          | 139.3(2)          | 135.7(2)          | 135.1(2)          |
| MeanValue              | 144.5            | 144.8             | 144.9             | 145.3             | 145.2             |

**Table SI6.** Framework atomic bond distances and angles for AgY760-PFOA at 25, 200, 250, 550, and 700 °C.

| Bond(Å)        | AgY760-PFOA-25 | AgY760-PFOA-200 | AgY760-PFOA-250 | AgY760-PFOA-550 | AgY760-PFOA-700 |
|----------------|----------------|-----------------|-----------------|-----------------|-----------------|
| <i>T-O1</i>    | 1.607(2)       | 1.609(2)        | 1.606(2)        | 1.603(2)        | 1.602(2)        |
| <i>T-O2</i>    | 1.596(2)       | 1.597(2)        | 1.599(2)        | 1.603(2)        | 1.603(2)        |
| <i>T-O3</i>    | 1.602(2)       | 1.592(2)        | 1.595(2)        | 1.601(2)        | 1.598(2)        |
| <i>T-O4</i>    | 1.608(2)       | 1.609(2)        | 1.610(2)        | 1.607(2)        | 1.609(2)        |
| MeanValue      | 1.603          | 1.602           | 1.603           | 1.604           | 1.603           |
| Angle(°)       | Value(°)       |                 |                 |                 |                 |
| <i>O1-T-O2</i> | 110.2(2)       | 109.7(2)        | 109.9(2)        | 110.0(1)        | 109.8(1)        |
| <i>O1-T-O3</i> | 109.6(2)       | 109.8(2)        | 109.8(2)        | 109.6(1)        | 109.8(1)        |
| <i>O1-T-O4</i> | 108.9(2)       | 109.0(2)        | 108.8(2)        | 108.2(1)        | 108.2(2)        |
| <i>O2-T-O3</i> | 109.5(2)       | 109.6(2)        | 109.6(2)        | 109.5(2)        | 109.6(2)        |
| <i>O2-T-O4</i> | 108.7(2)       | 108.7(2)        | 108.7(2)        | 109.3(2)        | 109.2(2)        |
| <i>O3-T-O4</i> | 109.6(2)       | 109.7(2)        | 109.8(2)        | 109.9(2)        | 109.9(2)        |
| MeanValue      | 109.4          | 109.4           | 109.4           | 109.4           | 109.4           |
| <i>T-O1-T</i>  | 138.9(4)       | 139.1(4)        | 140.2(4)        | 141.9(3)        | 143.1(3)        |
| <i>T-O2-T</i>  | 149.0(4)       | 149.7(4)        | 150.6(4)        | 151.8(3)        | 152.4(3)        |
| <i>T-O3-T</i>  | 146.0(3)       | 146.5(4)        | 148.0(4)        | 150.0(3)        | 150.7(3)        |
| <i>T-O4-T</i>  | 143.0(2)       | 142.6(3)        | 140.4(3)        | 136.8(2)        | 134.9(2)        |
| MeanValue      | 144.2          | 144.5           | 144.8           | 145.1           | 145.3           |

**Table SI7.** Framework atomic bond distances and angles for AgY760-PFOS at 25, 200, 250, 550, and 800 °C.

| Bond(Å)                | AgY760-PFOS-25 | AgY760-PFOS-200 | AgY760-PFOS-250 | AgY760-PFOS-550 | AgY760-PFOS-800 |
|------------------------|----------------|-----------------|-----------------|-----------------|-----------------|
| <i>T</i> -O1           | 1.609(2)       | 1.607(2)        | 1.606(2)        | 1.605(2)        | 1.604(2)        |
| <i>T</i> -O2           | 1.596(2)       | 1.600(2)        | 1.601(2)        | 1.603(2)        | 1.604(2)        |
| <i>T</i> -O3           | 1.606(2)       | 1.594(2)        | 1.593(2)        | 1.599(2)        | 1.600(2)        |
| <i>T</i> -O4           | 1.604(2)       | 1.607(2)        | 1.608(2)        | 1.607(2)        | 1.607(2)        |
| MeanValue              | 1.604          | 1.602           | 1.602           | 1.604           | 1.604           |
| Angle(°)               |                |                 | Value(°)        |                 |                 |
| O1- <i>T</i> -O2       | 110.2(2)       | 109.6(2)        | 109.7(2)        | 109.8(2)        | 110.0(1)        |
| O1- <i>T</i> -O3       | 109.4(2)       | 109.8(2)        | 110.0(2)        | 109.7(2)        | 109.6(1)        |
| O1- <i>T</i> -O4       | 109.0(2)       | 109.3(2)        | 109.1(2)        | 108.3(2)        | 108.2(2)        |
| O2- <i>T</i> -O3       | 109.3(2)       | 109.4(2)        | 109.4(2)        | 109.6(2)        | 109.6(2)        |
| O2- <i>T</i> -O4       | 109.1(2)       | 108.6(2)        | 108.6(2)        | 109.1(2)        | 109.2(2)        |
| O3- <i>T</i> -O4       | 109.6(2)       | 109.7(2)        | 109.8(2)        | 110.0(2)        | 110.0(2)        |
| MeanValue              | 109.4          | 109.4           | 109.4           | 109.4           | 109.4           |
| <i>T</i> -O1- <i>T</i> | 139.4(4)       | 136.9(4)        | 137.6(4)        | 140.3(4)        | 142.0(3)        |
| <i>T</i> -O2- <i>T</i> | 149.2(4)       | 148.8(4)        | 149.3(4)        | 151.5(4)        | 152.1(3)        |
| <i>T</i> -O3- <i>T</i> | 146.1(4)       | 144.4(4)        | 145.3(4)        | 149.0(4)        | 150.5(3)        |
| <i>T</i> -O4- <i>T</i> | 142.76(31)     | 145.9(3)        | 144.4(3)        | 139.0(3)        | 136.3(2)        |
| MeanValue              | 144.4          | 144.0           | 144.2           | 145.0           | 145.2           |

**Table SI8.** Extraframework atomic bond distances for AgY760 at 25, 200, 250, 550, and 900 °C.

| AgY760-25          |          |
|--------------------|----------|
| Distance           | Value(Å) |
| w1-w1              | 2.49(1)  |
| w1-w3              | 2.39(5)  |
| w1-w3[x2]          | 3.32(3)  |
| w2-w3[x3]          | 3.38(4)  |
| w3-O4              | 2.94(1)  |
| w3-w4              | 2.99(1)  |
| w4-w3              | 2.99(1)  |
| Ag(I)-O3[x6]       | 3.11(4)  |
| Ag(I)-Ag(IIb)[x3]  | 3.10(1)  |
| Ag(I')-O2[x3]      | 3.11(4)  |
| Ag(I')-O3[x3]      | 2.67(4)  |
| Ag(I')-Ag(IIb)[x3] | 2.82(1)  |
| Ag(IIb)-O2[x3]     | 2.49(4)  |
| Ag(IIb)-O4[x3]     | 3.24(4)  |

---

**AgY760-200**

---

| Distance           | Value(Å) |
|--------------------|----------|
| w1-O4              | 3.06(4)  |
| w1-O1[x2]          | 3.35(10) |
| w1-w2              | 1.71(13) |
| w1-w3[x2]          | 2.23(12) |
| w1-w3[x2]          | 3.26(16) |
| w2-w3[x4]          | 3.31(11) |
| w3-w3[x2]          | 2.70(2)  |
| w3-w4              | 2.82(2)  |
| Ag(I)-O3[x6]       | 2.83(1)  |
| Ag(I)-Ag(I')       | 2.84(5)  |
| Ag(I')-O2[x3]      | 3.02(1)  |
| Ag(I')-O3[x3]      | 2.56(5)  |
| Ag(I')-Ag(IIb)[x3] | 2.56(8)  |
| Ag(IIb)-O2[x3]     | 2.90(1)  |

---

**AgY760-250**

---

| Distance            | Value(Å) |
|---------------------|----------|
| w1-w2               | 2.01(2)  |
| w1-w3[x2]           | 2.17(2)  |
| w1-w3               | 2.97(3)  |
| w2-w1               | 2.00(2)  |
| w2-O4[x2]           | 3.31(1)  |
| w3-O4               | 3.02(1)  |
| w4-O2[x3]           | 2.48(1)  |
| w4-O4               | 2.86(1)  |
| w4-O4[x2]           | 2.86(1)  |
| Ag(I)-O3[x6]        | 2.84(1)  |
| Ag(I)-Ag(I')        | 2.76(3)  |
| Ag(I')-O2[x3]       | 2.53(1)  |
| Ag(I')-O3[x3]       | 2.98(2)  |
| Ag(I')-Ag(IIb)[x3]  | 2.50(1)  |
| Ag(IIb)-O2[x3]      | 3.09(1)  |
| Ag(IIb)-Ag(IIb)[x3] | 2.75(1)  |
| Ag(IIb)-w4          | 3.19(1)  |

---

**AgY760-550**

---

| Distance       | Value(Å) |
|----------------|----------|
| w1-O4          | 3.04(1)  |
| w1-w1          | 2.40(1)  |
| Ag(I)-O2[x6]   | 3.40(1)  |
| Ag(I)-O3[x6]   | 2.90(5)  |
| Ag(I)-Ag(I')   | 2.38(3)  |
| Ag(I')-O2[x3]  | 2.87(3)  |
| Ag(I')-O3[x3]  | 2.42(1)  |
| Ag(IIb)-O2[x3] | 2.23(5)  |
| Ag(IIb)-O4[x3] | 2.82(2)  |

| <b>AgY760-900</b> |          |
|-------------------|----------|
| Distance          | Value(Å) |
| Ag(I')-O2[x3]     | 2.88(1)  |
| Ag(I')-O4[x3]     | 2.46(1)  |
| Ag(I)-O3[x6]      | 2.91(3)  |
| Ag(I)-Ag(I')[x2]  | 2.47(5)  |
| Ag(IIb)-O2[x3]    | 2.33(8)  |
| Ag(IIb)-O4[x3]    | 2.78(3)  |

**Table SI9.** Extraframework atomic bond distances for AgY760-PFOA at 25, 200, 250, 550, and 700 °C.

| <b>AgY760-PFOA-25</b> |          |
|-----------------------|----------|
| Distance              | Value(Å) |
| O1-F1                 | 1.86(1)  |
| O3-F1                 | 2.29(4)  |
| O4-C5                 | 1.76(1)  |
| O4-F1                 | 1.84(4)  |
| w1-w1[x2]             | 2.43(1)  |
| w1-w1[x2]             | 2.55(3)  |
| w1-w2                 | 2.47(2)  |
| w1-w3[x2]             | 2.42(1)  |
| w1-w4[x3]             | 1.86(3)  |
| w1-C1[x2]             | 2.23(3)  |
| w1-C2[x2]             | 2.02(3)  |
| w1-C3[x2]             | 2.39(2)  |
| w2-w3                 | 2.08(1)  |
| w2-O1n                | 2.57(1)  |
| w2-O1n                | 2.57(4)  |
| w3-C2                 | 1.46(2)  |
| w3-C4                 | 1.83(2)  |
| w3-F2                 | 2.12(4)  |
| w3-H1                 | 2.11(1)  |
| w4-Ag(IIb)            | 2.53(1)  |
| Ag(I)-O3[x6]          | 2.76(1)  |
| Ag(I')-O4[x3]         | 3.29(2)  |
| Ag(I')-Ag(IIb)[x3]    | 2.17(2)  |
| Ag(IIb)-O2[x3]        | 2.58(1)  |
| Ag(IIb)-O2[x3]        | 2.39(3)  |
| Ag(IIb)-O4[x3]        | 2.85(3)  |

**AgY760-PFOA-200**

| Distance           | Value(Å) |
|--------------------|----------|
| O1-F1              | 1.86(1)  |
| O3-F1              | 2.28(3)  |
| O4-C5              | 1.77(1)  |
| O4-F2              | 1.83(4)  |
| w1-C1[x2]          | 2.41(3)  |
| w1-C1[x2]          | 2.09(3)  |
| w1-w1[x4]          | 2.38(1)  |
| w1-w1[x2]          | 1.66(1)  |
| w1-w1[x2]          | 1.97(1)  |
| Ag(I)-O3[x6]       | 2.77(1)  |
| Ag(I)-Ag(I')[x2]   | 2.43(4)  |
| Ag(I')-O3[x3]      | 2.91(3)  |
| Ag(I')-O2[x3]      | 2.36(3)  |
| Ag(I')-Ag(IIb)[x3] | 3.22(1)  |
| Ag(IIb)-O2[x3]     | 2.48(1)  |
| Ag(IIb)-O4[x3]     | 3.18(1)  |

**AgY760-PFOA-250**

| Distance           | Value(Å) |
|--------------------|----------|
| O1-F1              | 1.86(1)  |
| O3-F1              | 2.25(3)  |
| O4-C5              | 1.76(2)  |
| O4-F2              | 1.80(2)  |
| w1-C1[x2]          | 2.18(2)  |
| w1-w1[x2]          | 2.53(3)  |
| Ag(I)-O3[x6]       | 2.82(1)  |
| Ag(I)-Ag(I')[x2]   | 2.45(3)  |
| Ag(I')-O2[x3]      | 2.90(5)  |
| Ag(I')-O3[x3]      | 2.39(1)  |
| Ag(I')-Ag(IIb)[x3] | 3.17(1)  |
| Ag(IIb)-O2[x3]     | 2.51(1)  |

**AgY760-PFOA-550**

| Distance         | Value(Å) |
|------------------|----------|
| Ag(I)-O3[x6]     | 2.88(1)  |
| Ag(I)-Ag(I')[x3] | 2.27(9)  |
| Ag(I')-O2[x3]    | 2.85(1)  |
| Ag(I')-O3[x3]    | 2.38(2)  |



| <b>AgY760-PFOA-700</b> |          |
|------------------------|----------|
| Distance               | Value(Å) |
| Ag(I)-O3[x6]           | 2.91(4)  |
| Ag(I)-Ag(I')[x3]       | 2.13(2)  |
| Ag(I')-O2[x3]          | 2.83(1)  |
| Ag(I')-O3[x3]          | 2.38(1)  |

**Table SI10.** Extraframework atomic bond distances for AgY760-PFOS at 25, 200, 250, 550, and 800 °C.

| <b>AgY760-PFOS-25</b> |          |
|-----------------------|----------|
| Distance              | Value(Å) |
| O1-F1                 | 1.86(1)  |
| O1-O2n                | 2.54(4)  |
| O3-F1                 | 2.30(1)  |
| O4-C5                 | 1.75(1)  |
| O4-F2                 | 1.83(1)  |
| O4-F1                 | 1.84(2)  |
| w1-w1                 | 1.70(1)  |
| w1-w1[x4]             | 2.55(1)  |
| w1-w3[x2]             | 2.17(2)  |
| w1-C1[x2]             | 2.19(2)  |
| w3-C1[x2]             | 2.29(2)  |
| w3-C2[x2]             | 1.52(1)  |
| w3-C3[x2]             | 1.79(1)  |
| w3-H1                 | 1.79(1)  |
| w3-O1n                | 2.13(2)  |
| w3-w4[x3]             | 1.85(2)  |
| w4-C1[x6]             | 1.36(1)  |
| Ag(I)-O3[x6]          | 2.76(5)  |
| Ag(I')-O3[x3]         | 3.19(1)  |
| Ag(I')-Ag(I')[x3]     | 2.14(2)  |
| Ag(IIb)-O2[x3]        | 2.47(1)  |
| Ag(IIb)-O4[x3]        | 3.19(1)  |
| Ag(IIb)-Ag(I')[x3]    | 2.63(3)  |

---

**AgY760-PFOS-200**

---

| Distance           | Value(Å) |
|--------------------|----------|
| O1-F1              | 1.86(1)  |
| O1-O2n             | 2.53(1)  |
| O3-F1              | 2.31(5)  |
| O4-C5              | 1.77(5)  |
| O4-F1              | 1.83(5)  |
| O4-F2              | 1.87(4)  |
| w1-w1[x4]          | 2.15(3)  |
| w1-w1[x2]          | 2.48(2)  |
| w1-w3[x2]          | 2.48(2)  |
| w1-C1[2]           | 2.39(1)  |
| w3-C1              | 1.81(1)  |
| w3-C2              | 2.29(1)  |
| Ag(I)-O3[x6]       | 2.71(1)  |
| Ag(I)-Ag(I')[x3]   | 2.98(4)  |
| Ag(I')-O3[x3]      | 3.08(2)  |
| Ag(I')-O2[x3]      | 2.58(1)  |
| Ag(I')-Ag(IIb)[x3] | 2.78(4)  |
| Ag(IIb)-O2[x3]     | 3.27(1)  |
| Ag(IIb)-O4[x3]     | 2.59(2)  |

---

**AgY760-PFOS-250**

---

| Distance           | Value(Å) |
|--------------------|----------|
| O1-F1              | 1.86(1)  |
| O1-O2n             | 2.53(4)  |
| O3-F1              | 2.29(5)  |
| O4-C5              | 1.77(1)  |
| O4-F1              | 1.84(2)  |
| O4-F2              | 1.85(3)  |
| w1-w1[x4]          | 2.23(1)  |
| w1-w1[x2]          | 2.56(1)  |
| w1-w3[x2]          | 2.57(1)  |
| w1-C1[x2]          | 2.41(1)  |
| w3-C1[x2]          | 1.84(1)  |
| w3-C2[x2]          | 2.27(1)  |
| Ag(I)-O3[x6]       | 2.74(1)  |
| Ag(I)-Ag(I')[x3]   | 2.87(3)  |
| Ag(I')-O3[x3]      | 2.53(3)  |
| Ag(IIb)-O2[x3]     | 2.57(3)  |
| Ag(IIb)-Ag(I')[x3] | 2.86(4)  |

| <b>AgY760-PFOS-550</b> |          |
|------------------------|----------|
| Distance               | Value(Å) |
| O1-F1                  | 1.86(1)  |
| O1-O2n                 | 2.53(4)  |
| O3-F1                  | 2.23(1)  |
| O4-C5                  | 1.75(1)  |
| O4-F1                  | 1.86(4)  |
| O4-F2                  | 1.77(2)  |
| Ag(I)-O3[x6]           | 2.84(1)  |
| Ag(I)-Ag(I')[x3]       | 2.58(1)  |
| Ag(I')-O2[x3]          | 2.93(3)  |
| Ag(I')-O3[x3]          | 2.46(5)  |
| Ag(I')-Ag(IIb)[x3]     | 2.98(1)  |
| Ag(IIb)-O2[x3]         | 2.60(1)  |

| <b>AgY760-PFOS-800</b> |          |
|------------------------|----------|
| Distance               | Value(Å) |
| Ag(I)-O3[x6]           | 2.89(2)  |
| Ag(I)-Ag(I')[x3]       | 2.50(1)  |
| Ag(I')-O2[x3]          | 2.90(1)  |
| Ag(I')-O3[x3]          | 2.46(2)  |
| Ag(IIb)-O2[x3]         | 2.43(3)  |
| Ag(IIb)-O4[x3]         | 2.81(1)  |

**Table SI11.** Thermally induced evolution of O1-O1 and O4-O4 diameters for the 12MR apertures of zeolite Y channels in AgY760, AgY760-PFOA and AgY760-PFOS.

| Sample                 | O1-O1 (Å) | O4-O4 (Å) | Diameter (Å) | C.F.A. (Å <sup>2</sup> ) | ε*   |
|------------------------|-----------|-----------|--------------|--------------------------|------|
| <b>AgY760-25</b>       | 9.91      | 9.88      | 7.20         | 40.68                    | 1.00 |
| <b>AgY760-200</b>      | 9.92      | 9.89      | 7.20         | 40.72                    | 1.00 |
| <b>AgY760-250</b>      | 9.90      | 9.87      | 7.19         | 40.53                    | 1.00 |
| <b>AgY760-550</b>      | 9.95      | 9.78      | 7.17         | 40.31                    | 0.98 |
| <b>AgY760-900</b>      | 9.91      | 9.74      | 7.13         | 39.86                    | 0.98 |
| <b>AgY760-PFOA-25</b>  | 9.89      | 10.00     | 7.24         | 41.19                    | 1.01 |
| <b>AgY760-PFOA-200</b> | 9.91      | 10.00     | 7.26         | 41.34                    | 1.01 |
| <b>AgY760-PFOA-250</b> | 9.91      | 9.93      | 7.22         | 40.89                    | 1.00 |
| <b>AgY760-PFOA-550</b> | 9.89      | 9.79      | 7.14         | 40.03                    | 0.99 |
| <b>AgY760-PFOA-700</b> | 9.91      | 9.74      | 7.12         | 39.85                    | 0.98 |
| <b>AgY760-PFOS-25</b>  | 9.90      | 9.99      | 7.24         | 41.19                    | 1.01 |
| <b>AgY760-PFOS-200</b> | 9.87      | 10.09     | 7.28         | 41.58                    | 1.02 |
| <b>AgY760-PFOS-250</b> | 9.87      | 10.04     | 7.26         | 41.36                    | 1.02 |
| <b>AgY760-PFOS-550</b> | 9.87      | 9.86      | 7.17         | 40.34                    | 1.00 |
| <b>AgY760-PFOS-800</b> | 9.89      | 9.78      | 7.14         | 39.98                    | 0.99 |
